# Supplementary material for: Inorganic hydrogen-bonded SnO(OH)2as molecular springs boosted the piezocatalytic degradation of contaminants
Source: Royal Society of Chemistry journal article supplement (doi:10.1039/d2en01004f), 2023-01-01
Supplement: d2en01004f1.pdf [file d2en01004f1.pdf]

## *Supplementary materials*

### **Inorganic hydrogen-bonded SnO(OH)<sub>2</sub> as molecular springs boosted the piezocatalytic degradation of contaminants**

**Xiao Huang<sup>a,c</sup>, Wen Yan<sup>a,c</sup>, Jingxiang Sun<sup>a,c</sup>, Tao Hu<sup>a,c</sup>, Jinxi Feng<sup>\*,a,b</sup>, Zhen Huang<sup>d</sup>, Shuanghong Tian<sup>\*,a,c</sup>, Ya Xiong<sup>a,c</sup>**

a School of Environmental Science and Engineering, Sun Yat-Sen University, No. 135, Xingang Xi Road, Guangzhou 510275, P. R. China

b Guangdong Provincial Engineering Laboratory of Biomass High Value Utilization, Institute of Biological and Medical Engineering, Guangdong Academy of Sciences, Guangzhou 510316, P. R. China

c Guangdong Provincial Key Laboratory of Environmental Pollution Control and Remediation Technology, Sun Yat-Sen University, No. 135, Xingang Xi Road, Guangzhou 510275, P. R. China

d Chinese Academy of Science, Guangzhou Institute of Energy Conversion, Guangzhou 510640, P. R. China

**E-mail address:** fengjx18@163.com (Jinxi Feng); tshuangh@mail.sysu.edu.cn (Shuanghong Tian)

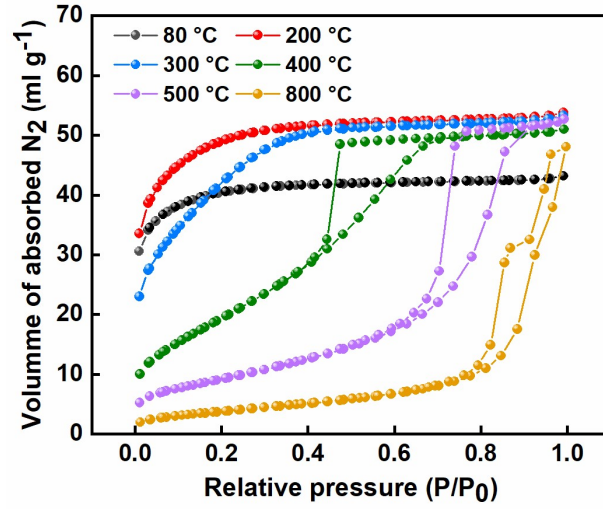

**Fig. S1.** N<sub>2</sub> adsorption-desorption isotherms of SnO<sub>x</sub>H<sub>y</sub>.

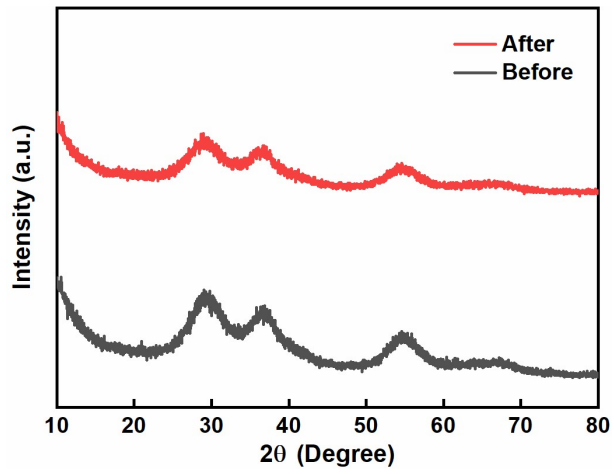

**Fig. S2.** XRD pattern of SnO(OH)<sub>2</sub> before and after cycles.

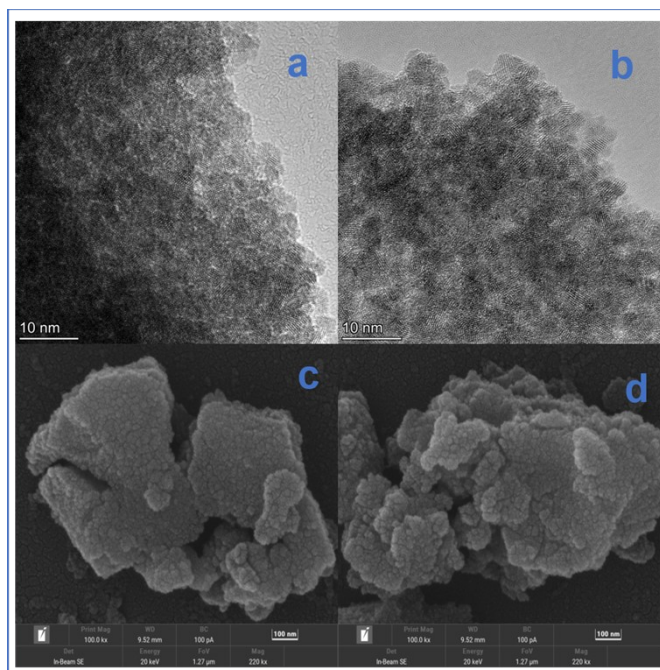

**Fig. S3.** The morphology and structure of the SnO(OH)<sub>2</sub> before and after cycles. (a: TEM before cycle; b: TEM after cycles; c: SEM before cycle; d: SEM after cycles)

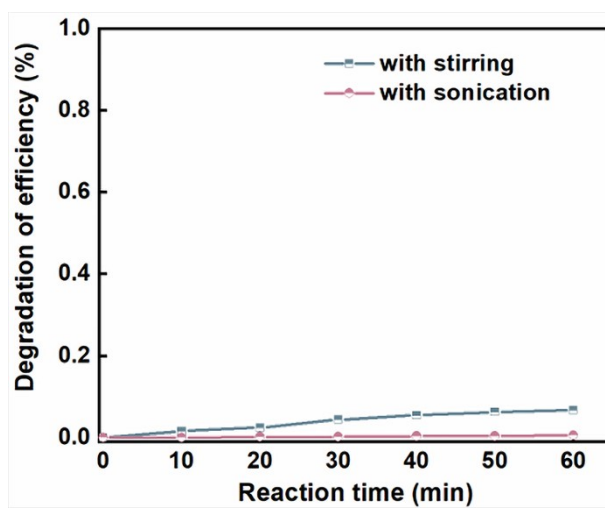

**Fig. S4.** The degradation of TCZ after addition H<sub>2</sub>O<sub>2</sub> with stirring and with sonication.

**Table S1.** Surface characteristics of SnO<sub>x</sub>H<sub>y</sub>.

| Samples | S <sub>BET</sub> (m <sup>2</sup> g <sup>-1</sup> ) | S <sub>ext</sub> (m <sup>2</sup> g <sup>-1</sup> ) | V <sub>total</sub> (cm <sup>3</sup> g <sup>-1</sup> ) | V <sub>meso</sub> (cm <sup>3</sup> g <sup>-1</sup> ) |
|---------|----------------------------------------------------|----------------------------------------------------|-------------------------------------------------------|------------------------------------------------------|
| 80 °C   | 149.12                                             | 108.14                                             | 0.0668                                                | 0.0206                                               |
| 200 °C  | 173.86                                             | 76.23                                              | 0.0832                                                | 0.0373                                               |
| 300 °C  | 153.16                                             | 160.81                                             | 0.0824                                                | 0.1032                                               |
| 400 °C  | 75.25                                              | 94.07                                              | 0.0789                                                | 0.0777                                               |
| 500 °C  | 58.63                                              | 60.13                                              | 0.0815                                                | 0.0820                                               |
| 800 °C  | 33.73                                              | 35.65                                              | 0.0743                                                | 0.0725                                               |
